# Supplementary material
Source: PubMed Central journal article supplement (PMC8082846)

| Study or Subgroup                                                                                       | Placebo/MTX |            | JAKI+MTX |             | Weight        | Risk Ratio               |                     |
|---------------------------------------------------------------------------------------------------------|-------------|------------|----------|-------------|---------------|--------------------------|---------------------|
|                                                                                                         | Events      | Total      | Events   | Total       |               | M-H, Random, 95% CI      | M-H, Random, 95% CI |
| <b>8.1.1 Tofacitinib 5mg + MTX</b>                                                                      |             |            |          |             |               |                          |                     |
| Burmester 2013                                                                                          | 0           | 33         | 0        | 83          |               | Not estimable            |                     |
| Van der Hejide 2019                                                                                     | 0           | 60         | 15       | 637         | 27.5%         | 0.34 [0.02, 5.57]        |                     |
| Vollenhaven 2012                                                                                        | 0           | 32         | 2        | 239         | 23.8%         | 1.45 [0.07, 29.64]       |                     |
| <b>Subtotal (95% CI)</b>                                                                                |             | <b>125</b> |          | <b>959</b>  | <b>51.3%</b>  | <b>0.66 [0.09, 5.18]</b> |                     |
| Total events                                                                                            | 0           |            | 17       |             |               |                          |                     |
| Heterogeneity: Tau <sup>2</sup> = 0.00; Chi <sup>2</sup> = 0.52, df = 1 (P = 0.47); I <sup>2</sup> = 0% |             |            |          |             |               |                          |                     |
| Test for overall effect: Z = 0.39 (P = 0.70)                                                            |             |            |          |             |               |                          |                     |
| <b>8.1.2 Tofacitinib 10mg + MTX</b>                                                                     |             |            |          |             |               |                          |                     |
| Burmester 2013                                                                                          | 0           | 33         | 0        | 84          |               | Not estimable            |                     |
| Van der Hejide 2019                                                                                     | 0           | 60         | 12       | 649         | 27.3%         | 0.43 [0.03, 7.11]        |                     |
| Vollenhaven 2012                                                                                        | 0           | 32         | 1        | 233         | 21.4%         | 2.36 [0.10, 56.83]       |                     |
| <b>Subtotal (95% CI)</b>                                                                                |             | <b>125</b> |          | <b>966</b>  | <b>48.7%</b>  | <b>0.90 [0.11, 7.44]</b> |                     |
| Total events                                                                                            | 0           |            | 13       |             |               |                          |                     |
| Heterogeneity: Tau <sup>2</sup> = 0.00; Chi <sup>2</sup> = 0.67, df = 1 (P = 0.41); I <sup>2</sup> = 0% |             |            |          |             |               |                          |                     |
| Test for overall effect: Z = 0.09 (P = 0.93)                                                            |             |            |          |             |               |                          |                     |
| <b>Total (95% CI)</b>                                                                                   |             | <b>250</b> |          | <b>1925</b> | <b>100.0%</b> | <b>0.77 [0.18, 3.36]</b> |                     |
| Total events                                                                                            | 0           |            | 30       |             |               |                          |                     |
| Heterogeneity: Tau <sup>2</sup> = 0.00; Chi <sup>2</sup> = 1.24, df = 3 (P = 0.74); I <sup>2</sup> = 0% |             |            |          |             |               |                          |                     |
| Test for overall effect: Z = 0.34 (P = 0.73)                                                            |             |            |          |             |               |                          |                     |
| Test for subgroup differences: Chi <sup>2</sup> = 0.04, df = 1 (P = 0.84), I <sup>2</sup> = 0%          |             |            |          |             |               |                          |                     |

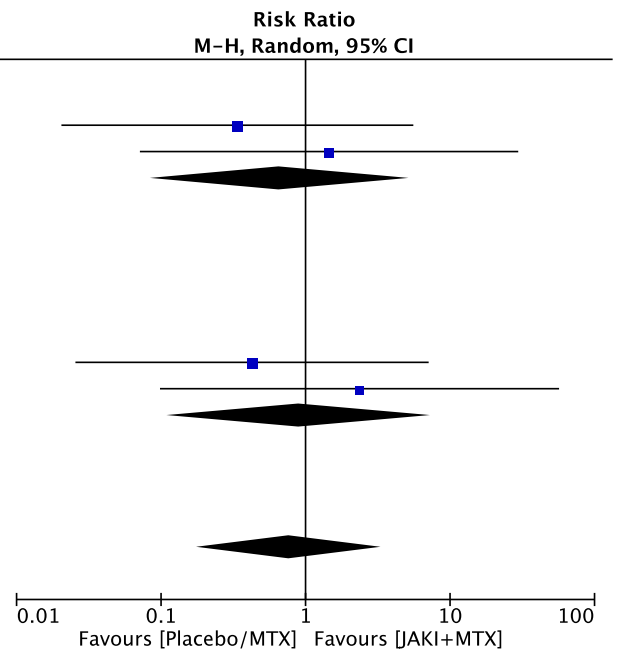

Supplement: 13317_2021_153_MOESM2_ESM.pdf [file 13317_2021_153_MOESM2_ESM.pdf]
