# Supplementary material
Source: PubMed Central journal article supplement (PMC8082846)

| Study or Subgroup                             | Placebo/MTX |            | JAKI+MTX |            | Weight | Risk Ratio           | Risk Ratio          |
|-----------------------------------------------|-------------|------------|----------|------------|--------|----------------------|---------------------|
|                                               | Events      | Total      | Events   | Total      |        | M-H, Random, 95% CI  | M-H, Random, 95% CI |
| <b>8.5.1 Filgotinib 25mg + MTX</b>            |             |            |          |            |        |                      |                     |
| Westhovens 2017                               | 0           | 32         | 0        | 34         |        | Not estimable        |                     |
| <b>Subtotal (95% CI)</b>                      |             | <b>32</b>  |          | <b>34</b>  |        | <b>Not estimable</b> |                     |
| Total events                                  | 0           |            | 0        |            |        |                      |                     |
| Heterogeneity: Not applicable                 |             |            |          |            |        |                      |                     |
| Test for overall effect: Not applicable       |             |            |          |            |        |                      |                     |
| <b>8.5.2 Filgotinib 50mg + MTX</b>            |             |            |          |            |        |                      |                     |
| Westhovens 2017                               | 0           | 32         | 0        | 78         |        | Not estimable        |                     |
| <b>Subtotal (95% CI)</b>                      |             | <b>32</b>  |          | <b>78</b>  |        | <b>Not estimable</b> |                     |
| Total events                                  | 0           |            | 0        |            |        |                      |                     |
| Heterogeneity: Not applicable                 |             |            |          |            |        |                      |                     |
| Test for overall effect: Not applicable       |             |            |          |            |        |                      |                     |
| <b>8.5.3 Filgotinib 100mg + MTX</b>           |             |            |          |            |        |                      |                     |
| Westhovens 2017                               | 0           | 32         | 0        | 84         |        | Not estimable        |                     |
| <b>Subtotal (95% CI)</b>                      |             | <b>32</b>  |          | <b>84</b>  |        | <b>Not estimable</b> |                     |
| Total events                                  | 0           |            | 0        |            |        |                      |                     |
| Heterogeneity: Not applicable                 |             |            |          |            |        |                      |                     |
| Test for overall effect: Not applicable       |             |            |          |            |        |                      |                     |
| <b>8.5.4 Filgotinib 200mg + MTX</b>           |             |            |          |            |        |                      |                     |
| Westhovens 2017                               | 0           | 32         | 0        | 38         |        | Not estimable        |                     |
| <b>Subtotal (95% CI)</b>                      |             | <b>32</b>  |          | <b>38</b>  |        | <b>Not estimable</b> |                     |
| Total events                                  | 0           |            | 0        |            |        |                      |                     |
| Heterogeneity: Not applicable                 |             |            |          |            |        |                      |                     |
| Test for overall effect: Not applicable       |             |            |          |            |        |                      |                     |
| <b>Total (95% CI)</b>                         |             | <b>128</b> |          | <b>234</b> |        | <b>Not estimable</b> |                     |
| Total events                                  | 0           |            | 0        |            |        |                      |                     |
| Heterogeneity: Not applicable                 |             |            |          |            |        |                      |                     |
| Test for overall effect: Not applicable       |             |            |          |            |        |                      |                     |
| Test for subgroup differences: Not applicable |             |            |          |            |        |                      |                     |

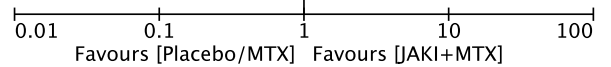

Supplement: 13317_2021_153_MOESM5_ESM.pdf [file 13317_2021_153_MOESM5_ESM.pdf]
