# Supplementary material
Source: PubMed Central journal article supplement (PMC8082846)

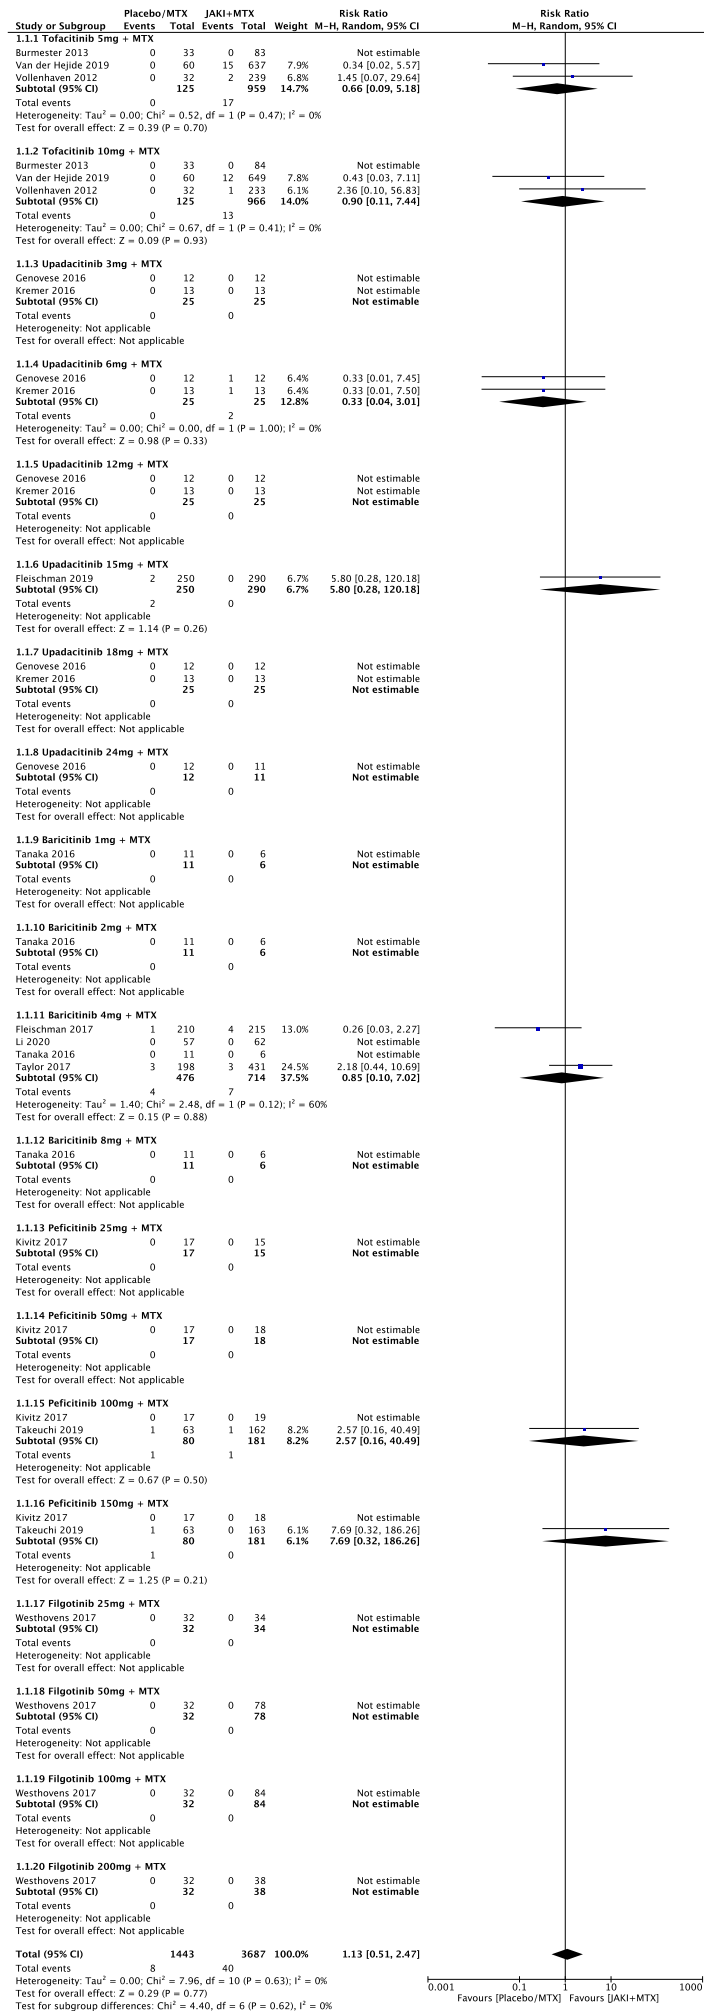

Supplement: 13317_2021_153_MOESM1_ESM.pdf [file 13317_2021_153_MOESM1_ESM.pdf]
